# Supplementary material for: Virtual organelle self-coding for fluorescence imaging via adversarial learning
Source: PubMed Central journal article supplement (PMC7522603; doi:10.1117/1.jbo.25.9.096009), 2020-09-29
Supplement: JBO_025_096009_SD001.pdf [file JBO_025_096009_SD001.pdf]

## Supplementary Information

### Virtual organelle self-coding for fluorescence imaging via adversarial learning

Thanh Nguyen<sup>1,\*</sup>, Vy Bui<sup>1</sup>, Anh Thai<sup>1</sup>, Van Lam<sup>2</sup>, Christopher Raub<sup>2</sup>, Lin-Ching Chang<sup>1</sup>, George Nehmetallah<sup>1</sup>

<sup>1</sup> Electrical Engineering and Computer Science Department, The Catholic University of America, Washington DC, 20064, USA

<sup>2</sup> Biomedical Engineering Department, The Catholic University of America, Washington DC, 20064, USA

\*Correspondence: [32nguyen@cua.edu](mailto:32nguyen@cua.edu)

## Methods

### Computational pipeline with CellProfiler:

Original pipeline could be found at [20], modified version that we used can be found at: [https://github.com/32nguyen/SupplementaryMethod\\_CellProfiler](https://github.com/32nguyen/SupplementaryMethod_CellProfiler)

Python codes to extract the feature data automatically if not familiar with MySQL. Example of feature measurement is also provided to observation. Original dataset could be downloaded at <https://data.broadinstitute.org/bbbc/BBBC025/>,

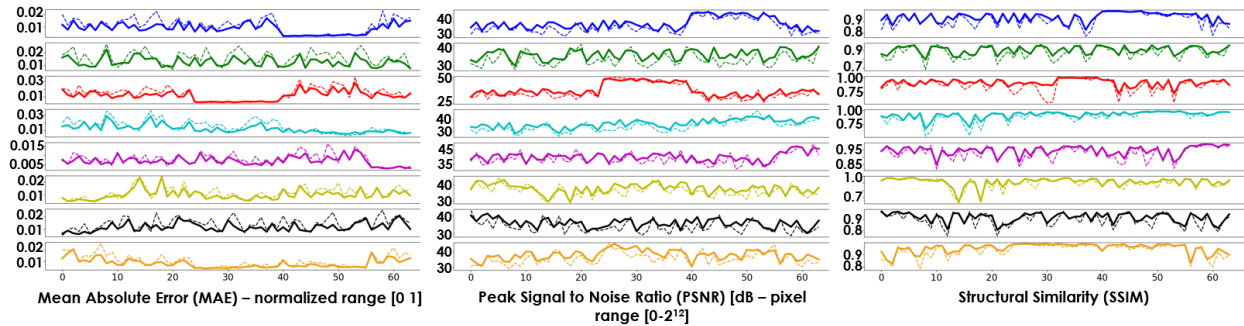

**Supplemental Fig. 1:** MAE, PSNR, and SSIM on 64 predicted images vs. focused ground truth images per z depth (-10, -8, -6, -4, 4, 6, 8 and 10 $\mu$ m, top to bottom) with AF model's prediction, dash line is out-focus image v/s ground truth, solid line is predicted image v/s ground truth.

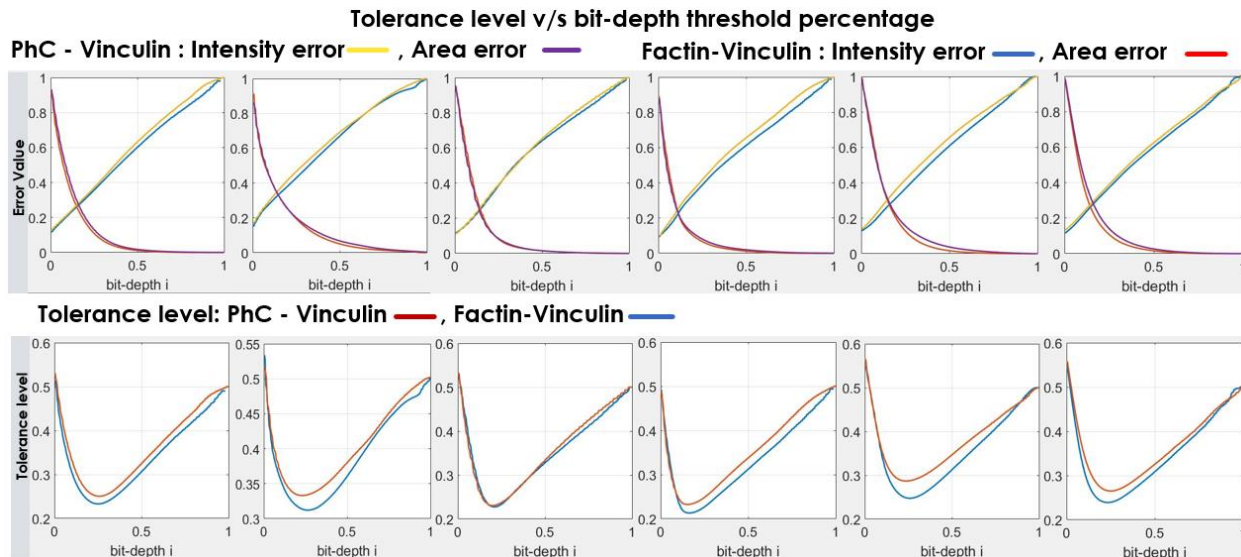

**Supplemental Fig. 2:** Tolerance level (y-axes) v/s bit-depth threshold percentage (x-axes) computed on 6 testing images (left to right). The first row is the intensity error ( $IE$ ) versus area fraction of intensity-based segmentation error ( $SE$ ) of both PhC-Fluo 2 and Fluo-Fluo 1 models. The second row is the summation of equally-weighted  $IE$  and  $SE$  ( $\beta_1=\beta_2=0.5$ ) of both PhC-Fluo 2 and Fluo-Fluo 1 models.

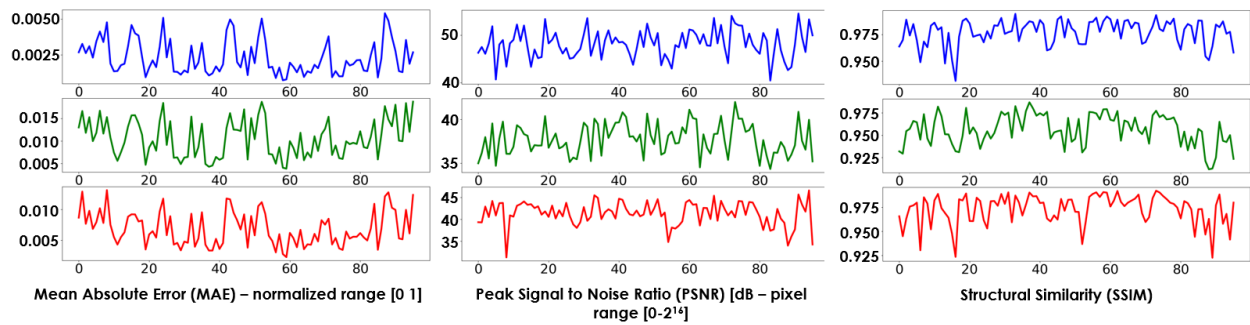

**Supplemental Fig. 3:** MAE, PSNR, SSIM on 96 predicted nucleus DAPI/Hoechst, Endoplasmic reticulum and Mitochondria images vs. corresponding ground truth fluorescence images in testing dataset of U2OS-PS. Top to bottom are for DAPI/Hoechst, Endoplasmic reticulum, and Mitochondria, respectively.

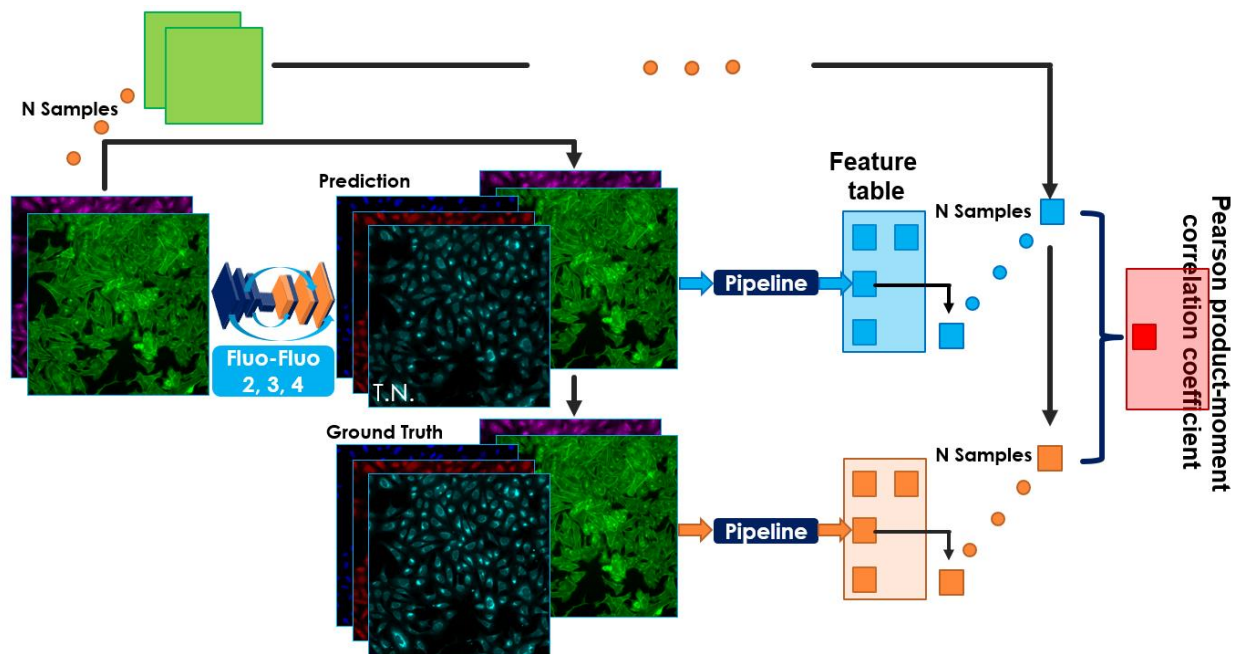

**Supplemental Fig. 4:** Procedure for Pearson product-moment correlation coefficient extracted from feature measurement table. Each feature type in table from original (5) channels and hybrid-virtual (2+3) channels crossing  $N$  samples (each sample is an image which has 5 channels) to compute the Pearson product-moment correlation coefficient.

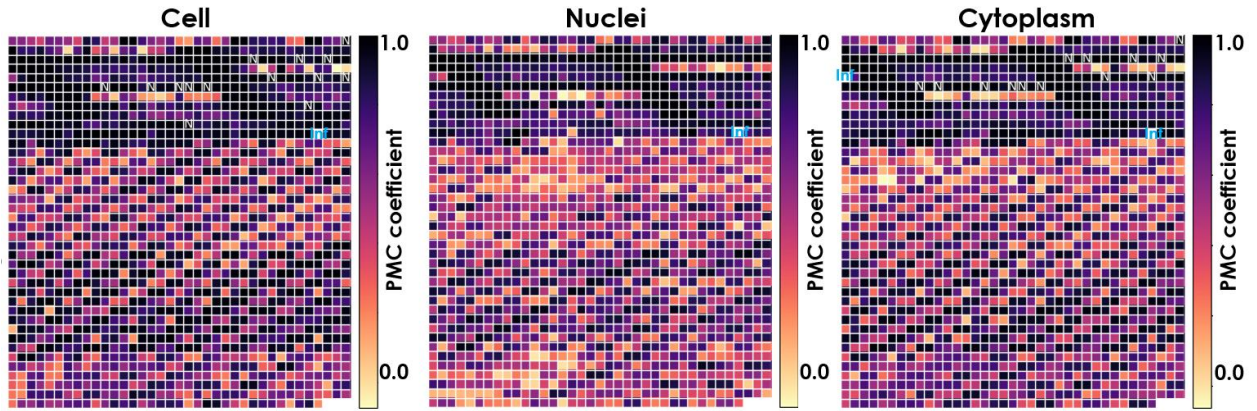

**Supplemental Fig. 5:** Pearson product-moment correlation coefficient of each feature measurement across 96 images on testing data between original (5) channels and hybrid-virtual (2+3) channels. “N” marks the correlation coefficients of features measured only on 2-channel input images in both cases (Golgi apparatus + F-actin) which results perfect correlations. “Inf” marks un-resolved correlation due to 0-division in measurements. Those features are distributed across 3 compartments: Cell, nuclei, and cytoplasm [20] (see Supplement - Methods for feature’s organization and Supplement Fig. 6 for full feature measurements).

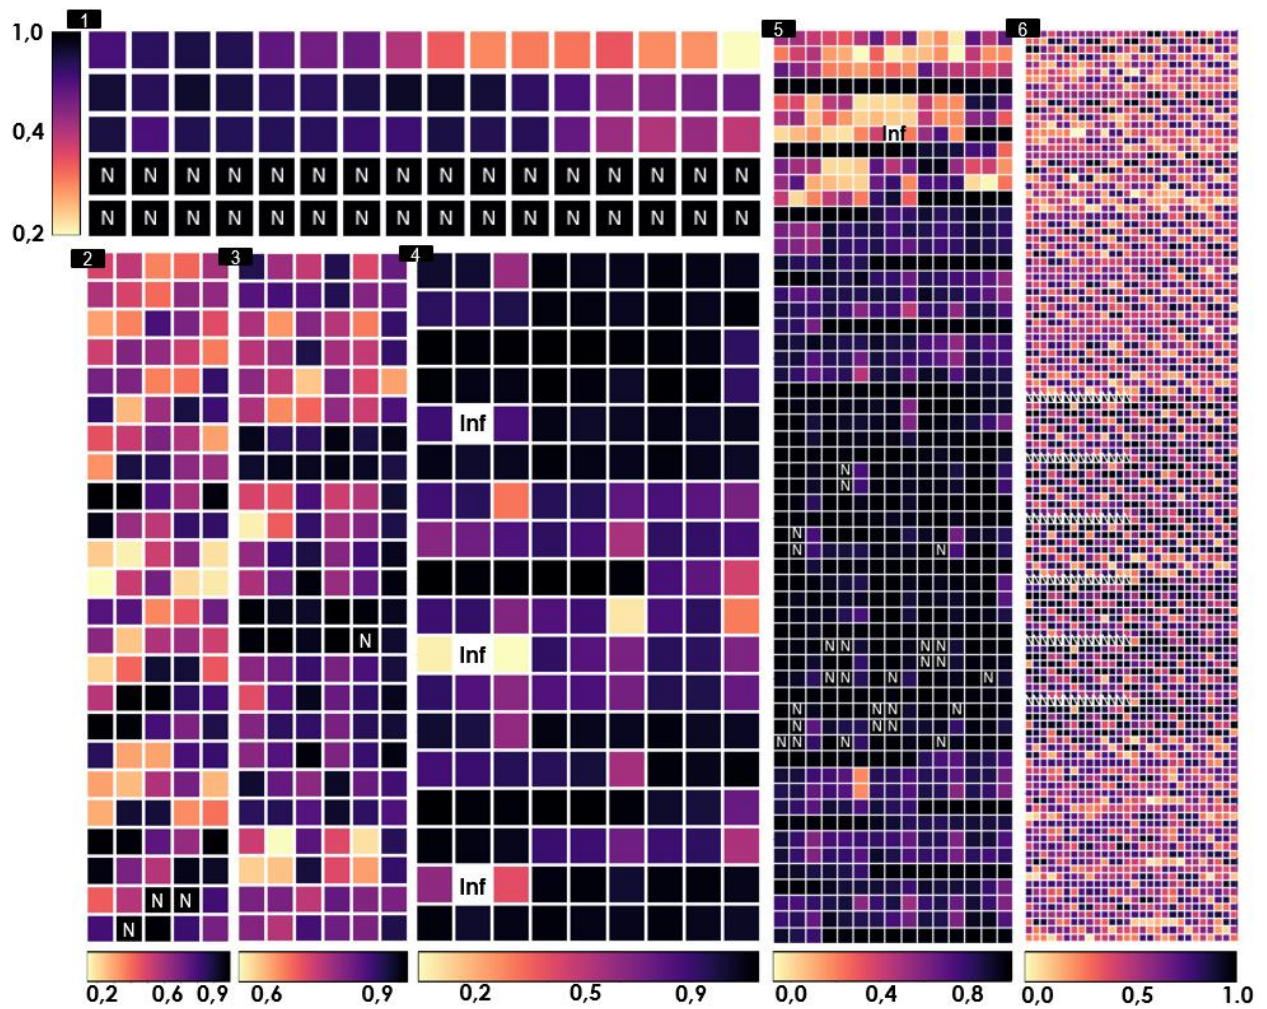

**Supplemental Fig. 6:** Pearson product-moment correlation coefficient of each feature measurement across 96 samples on testing data between original 5 channels and 2+3 channels (2 of inputs and 3 of predictions). “N” marks the correlation coefficients of features measured only on 2-channel input images in both cases (Golgi apparatus + F-actin) which results perfect correlations. “Inf” marks un-resolved correlation due to 0-division in measurements. Following #1-6, PMC coefficient is following 6 feature groups: Granularity, correlation, radial distribution, size-shape, intensity, and texture. Correlation coefficient grids were re-organized as the last axis index changing fastest.
